# Supplementary material for: Potassium ion-selective fluorescent and pH independent nanosensors based on functionalized polyether macrocycles
Source: Royal Society of Chemistry journal article supplement (doi:10.1039/c5sc03301b), 2015-10-08
Supplement: c5sc03301b1.pdf [file c5sc03301b1.pdf]

Supporting information for

# Potassium Ion-selective Fluorescent and pH Independent Nanosensors Based on Functionalized Polyether Macrocycles

*Zdeňka Jarolímová<sup>1</sup>, Mahesh Vishe<sup>2</sup>, Jérôme Lacour<sup>2</sup> and Eric Bakker<sup>1</sup>*

<sup>1</sup>Department of Inorganic and Analytical Chemistry, <sup>2</sup>Department of Organic Chemistry, University of Geneva, Quai Ernest-Ansermet 30, CH-1211 Geneva, Switzerland.

## General Remarks

NMR spectra were recorded on 300, 400 or 500 MHz spectrometer at 20 °C unless otherwise stated. <sup>1</sup>H-NMR chemical shifts are given in ppm relative to Me<sub>4</sub>Si with the solvent resonance used as the internal standard (CDCl<sub>3</sub> δ = 7.26 ppm). <sup>13</sup>C-NMR (125 or 101 MHz) chemical shifts were given in ppm relative to Me<sub>4</sub>Si with the solvent resonance used as the internal standard (CDCl<sub>3</sub> = 77.16 ppm). IR spectra were recorded using an ATR sampler and are reported in wave numbers (cm<sup>-1</sup>). Melting points (Mp) were measured in open capillary tubes and were uncorrected. Optical rotations were measured in a thermostated (20 °C) 10.0 cm long microcell at 589 nm (Na) or 435 nm (Hg) and are reported as follows: [α]<sub>D</sub> (c (g/mL), solvent). Electrospray mass spectra (ESI +) were obtained by the department of Mass Spectrometry of the University of Geneva. All reactions involving air sensitive compounds were carried out under dry N<sub>2</sub> or argon by means of an inert gas/vacuum double manifold line and standard Schlenk techniques. Flash column chromatography was performed with silica gel 40-63 or alumina (neutral Brockmann I, 50-200 μm).

## General procedure for the synthesis of macrocycles.

*t*-BuOK (44.8 mg, 0.4 mmol) was added into the suspension of starting macrocycles (0.1 mmol) and 1-aminopyrene (0.4 mmol) in 1.0 mL of dry THF at -100 °C (see Figure S1). After 2 minutes, the cooling bath (EtOH, N<sub>2</sub> liquid) was removed and the reaction was allowed to reach room temperature on its own. It was stirred for additional 2 hours. Without further treatment or work-up, the reaction mixture was purified by column chromatography (SiO<sub>2</sub>) or preparative TLC.<sup>1</sup>

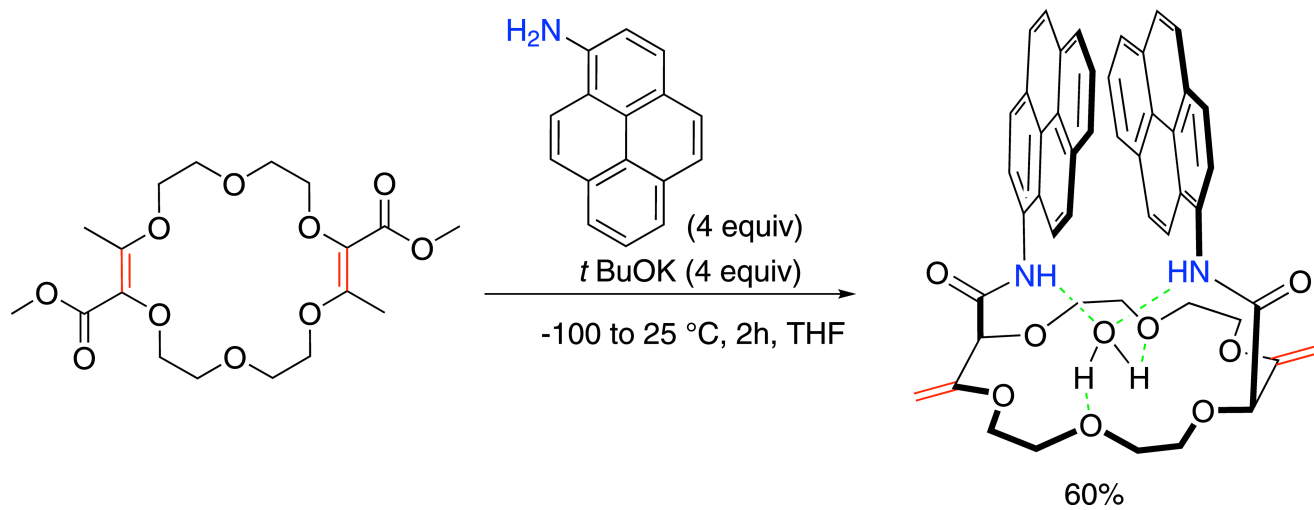

**Figure S1.** Synthetic routes to macrocyclic compounds functionalized with pyreneamide derivatives.

<sup>1</sup> Vishe, M.; Hrdina, R.; Poblador-Bahamonde, A. I.; Besnard, C.; Guenee, L.; Buerger, T.; Lacour, J. *Chem. Sci.* **2015**.

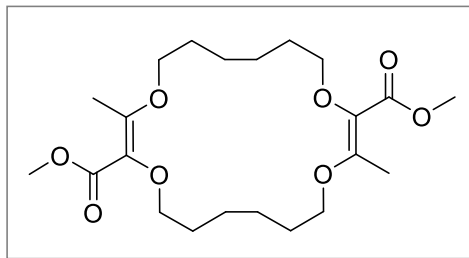

**Figure S2.** Starting material used for the synthesis of reported macrocyclic compounds.<sup>2</sup>

**Yield:** 30 %

**M.p.** 106 °C - 107 °C (crystallized from heptane/CH<sub>2</sub>Cl<sub>2</sub>)

**R<sub>f</sub>** : 0.24 (silica gel, mobile phase Pentane : Ether 5/5)

m.p. : 106 °C – 107 °C ( recrystallized from Heptane and CH<sub>2</sub>Cl<sub>2</sub> mixture).

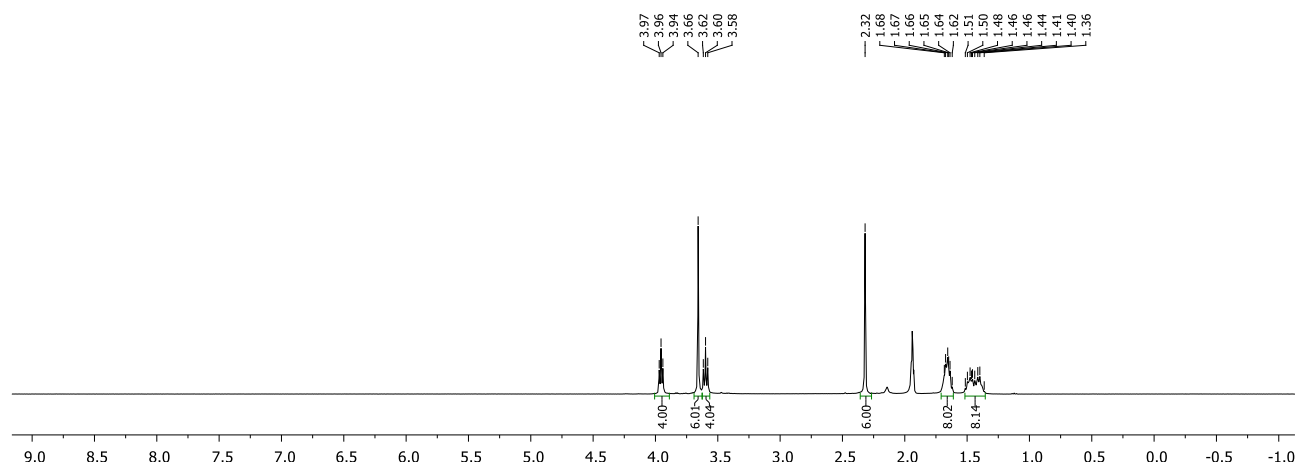

**Figure S3.** <sup>1</sup>H NMR (400 MHz, CD<sub>3</sub>CN): δ/ppm = 1.53-1.31 (m, 8H), 1.74-1.59 (m, 8H), 2.32 (s, 6H), 3.60 (t, *J* = 7.2 Hz, 4H), 3.66<sup>3</sup> (s, 6H), 3.96 (t, *J* = 5.9 Hz, 4H).

<sup>2</sup> Zeghida, W.; Besnard, C.; Lacour, J. *Angew. Chem. Int. Ed.* **2010**, *49*, 7253-7256.

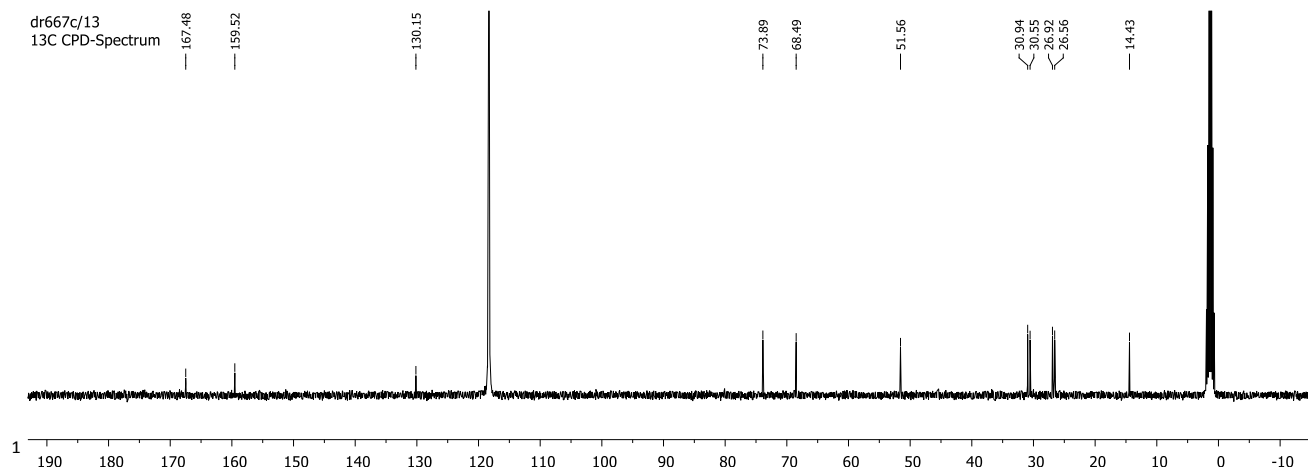

**Figure S4.**  $^{13}\text{C}$  NMR (101 MHz,  $\text{CD}_3\text{CN}$ ):  $\delta/\text{ppm}$  : 14.4 ( $2\text{CH}_3$ ), 26.5 ( $2\text{CH}_2$ ), 26.9 ( $2\text{CH}_2$ ), 30.5 ( $2\text{CH}_2$ ), 30.9 ( $2\text{CH}_2$ ), 51.5 ( $2\text{CH}_3$ ), 68.4 ( $2\text{CH}_2$ ), 73.8 ( $2\text{CH}_2$ ), 130.1 ( $2\text{C}$ ), 159.5 ( $2\text{C}$ ), 167.4 ( $2\text{C}$ ).

**IR** (neat):  $\tilde{\nu}/\text{cm}^{-1}$  2936, 2860, 1703, 1609, 1439, 1384, 1271, 1192, 1151, 1086, 997, 774  $\text{cm}^{-1}$

**HR-ESI:**  $m/z = 429.2487$  [ $\text{M}+\text{H}$ ] $^+$  (calculated for  $\text{C}_{22}\text{H}_{36}\text{O}_8$   $m/z = 429.2483$ ).

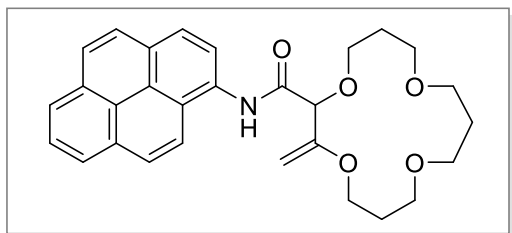

**Figure S5.** 15C4.

**Yield:** 85% of red crystalline solid (140 mg)

**M. p.** 119 °C - 120 °C (crystallized from CH<sub>2</sub>Cl<sub>2</sub> / Heptane)

**R<sub>f</sub>** : 0.48 (silica gel, mobile phase EtOAc)

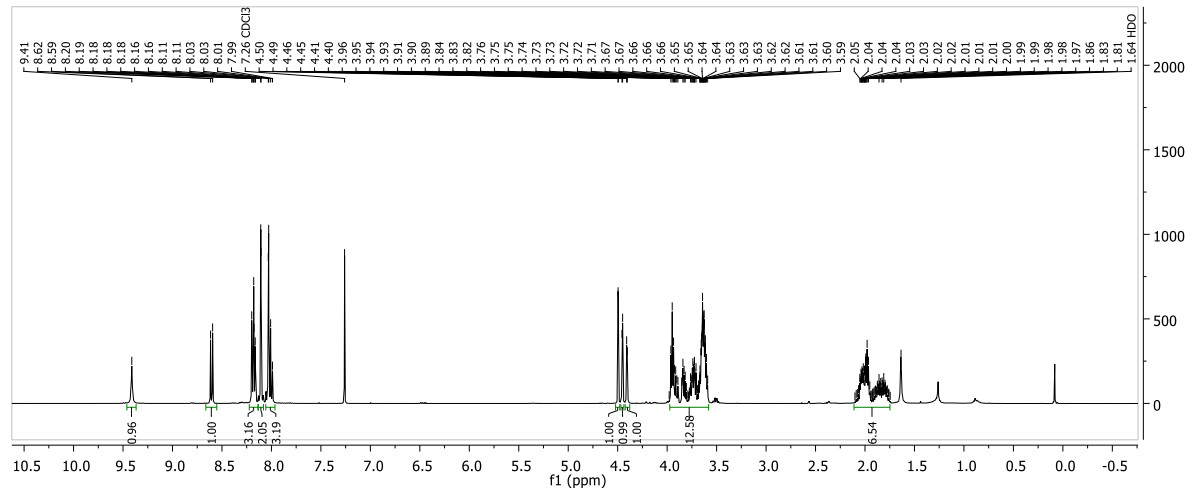

**Figure S6.** <sup>1</sup>H NMR (400 MHz, CDCl<sub>3</sub>): δ/ppm = 1.75 – 2.10 (m, 6H), 3.59 – 3.98 (m, 12H), 4.41 (d, *J* = 2.6 Hz, 1H), 4.45 (d, *J* = 2.6 Hz, 1H), 4.50 (s, 1H), 7.99 – 8.03 (m, 3H), 8.1 (s, 2H), 8.16 – 8.20 (m, 3H), 8.60 (d, *J* = 8.3 Hz, 1H) 9.41 (s, 1H).

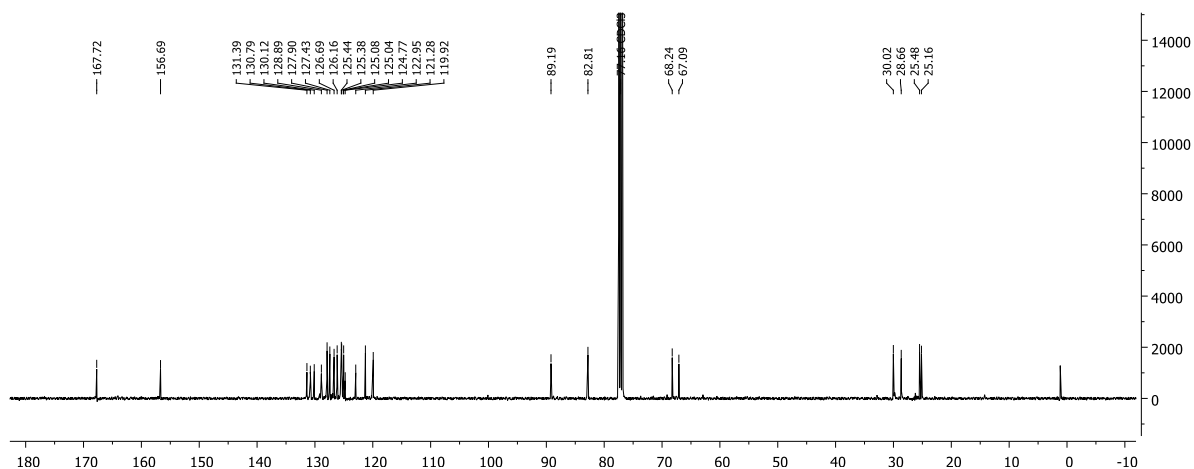

**Figure S7.**  $^{13}\text{C}$  NMR (101 MHz,  $\text{CDCl}_3$ ):  $\delta/\text{ppm} = 29.45$  ( $1\text{CH}_2$ ),  $30.58$  ( $1\text{CH}_2$ ),  $30.97$  ( $1\text{CH}_2$ ),  $63.82$  ( $1\text{CH}_2$ ),  $66.55$  ( $1\text{CH}_2$ ),  $66.90$  ( $1\text{CH}_2$ ),  $67.00$  ( $2\text{CH}_2$ ),  $67.53$  ( $1\text{CH}_2$ ),  $83.10$  ( $1\text{CH}$ ),  $88.36$  ( $1\text{CH}_2$ ),  $120.10$  ( $1\text{CH}$ ),  $121.29$  ( $1\text{CH}$ ),  $123.03$  ( $1\text{C}$ ),  $124.94$  ( $1\text{CH}$ ),  $125.08$  ( $1\text{C}$ ),  $125.30$  ( $1\text{C}$ ),  $125.52$  ( $1\text{CH}$ ),  $125.57$  ( $1\text{CH}$ ),  $126.28$  ( $1\text{CH}$ ),  $126.82$  ( $1\text{CH}$ ),  $127.53$  ( $1\text{CH}$ ),  $128.01$  ( $1\text{CH}$ ),  $129.04$  ( $1\text{C}$ ),  $130.22$  ( $1\text{C}$ ),  $130.93$  ( $1\text{C}$ ),  $131.52$  ( $1\text{C}$ ),  $157.93$  ( $1\text{C}$ ),  $167.89$  ( $1\text{C}$ ).

**IR** (neat):  $\tilde{\nu}/\text{cm}^{-1} = 3382, 2867, 1695, 1624, 1555, 1512, 1484, 1325, 1207, 1121, 1086, 1031, 1014, 850, 815, 756, 709, 613$ .

**HR-ESI:**  $m/z = 474.2281$  [ $\text{M}+\text{H}$ ] $^+$  (calculated for  $\text{C}_{29}\text{H}_{31}\text{NO}_5$   $m/z = 474.2275$ )

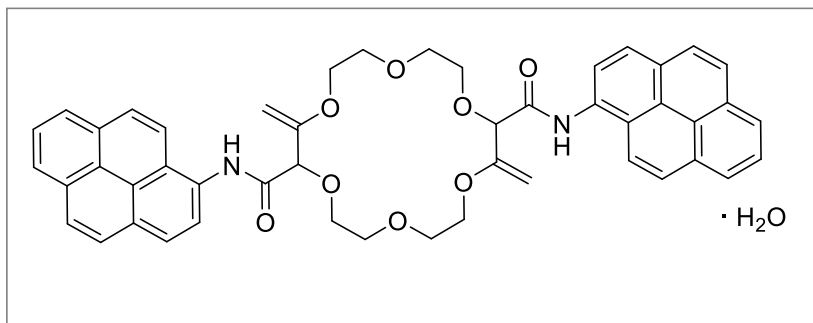

**Figure S8.** 18C6.

**Yield:** 60 % of off white solid (115 mg)

**X-ray** crystallized from  $\text{CH}_2\text{Cl}_2$ / heptane (see crystallographic section)

**R<sub>f</sub>** : 0.28 (silica gel, mobile phase MeOH/  $\text{CH}_2\text{Cl}_2$  5/95)

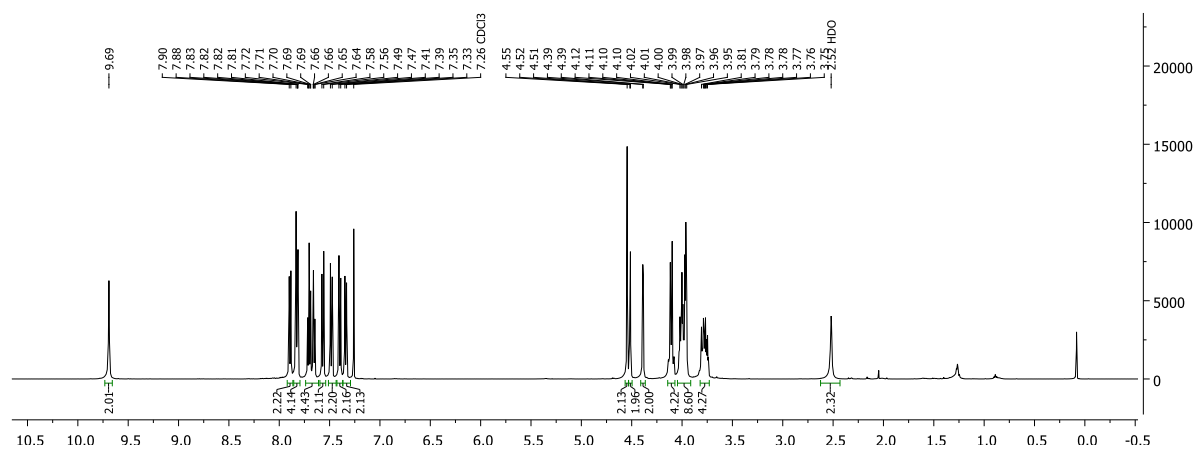

**Figure S9.**  $^1\text{H}$  NMR (500 MHz,  $\text{CDCl}_3$ ):  $\delta$ /ppm = 2.52 (bs,  $\text{H}_2\text{O}$ ), 3.74 – 3.81 (m, 4H), 3.95 – 4.03 (m, 8H), 4.08 – 4.13 (m, 4H), 3.98 – 4.01 (m, 2H), 4.39 (d,  $J = 2.7$  Hz, 2H), 4.52 (d,  $J = 2.7$  Hz, 2H), 4.55 (s, 2H), 7.34 (d,  $J = 8.1$  Hz, 2H), 7.40 (d,  $J = 8.8$  Hz, 2H), 7.48 (d,  $J = 9.1$  Hz, 2H), 7.57 (d,  $J = 8.8$  Hz, 2H), 7.64 – 7.66 (m, 2H), 7.70 (t,  $J = 7.5$  Hz, 2H), 7.81 – 7.83 (m, 4H), 7.89 (d,  $J = 8.1$  Hz, 2H), 9.69 (s, 2H).







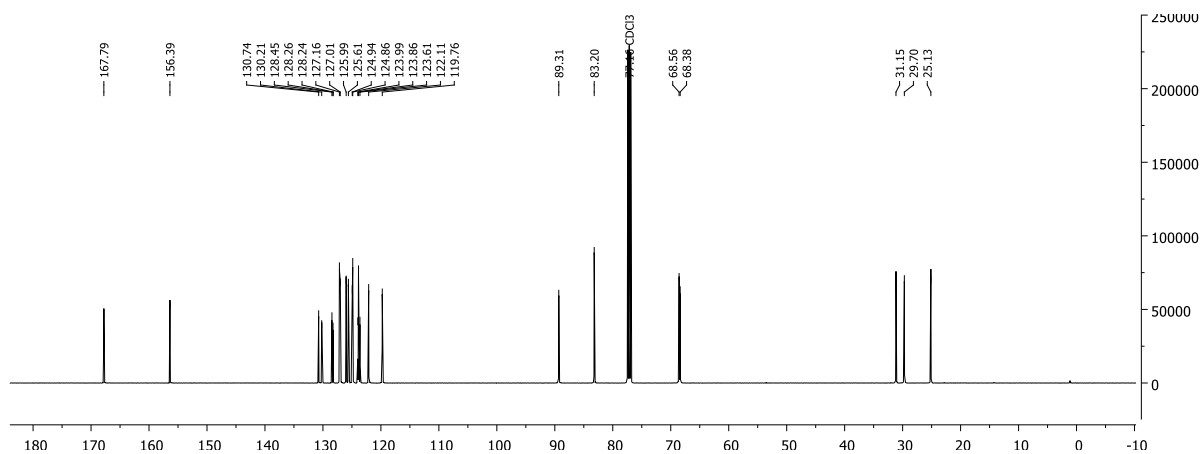

**Figure S13.**  $^{13}\text{C}$  NMR (126 MHz,  $\text{CDCl}_3$ ):  $\delta/\text{ppm} = 25.13$  ( $2\text{CH}_2$ ),  $29.70$  ( $2\text{CH}_2$ ),  $31.15$  ( $2\text{CH}_2$ ),  $68.38$  ( $2\text{CH}_2$ ),  $68.56$  ( $2\text{CH}_2$ ),  $83.20$  ( $2\text{CH}$ ),  $89.31$  ( $2\text{CH}_2$ ),  $119.76$  ( $2\text{CH}$ ),  $122.11$  ( $2\text{CH}$ ),  $123.61$  ( $2\text{C}$ ),  $123.86$  ( $2\text{CH}$ ),  $123.86$  ( $2\text{C}$ ),  $123.99$  ( $2\text{C}$ ),  $124.86$  ( $2\text{CH}$ ),  $124.94$  ( $2\text{CH}$ ),  $125.61$  ( $2\text{CH}$ ),  $125.99$  ( $2\text{CH}$ ),  $127.01$  ( $2\text{CH}$ ),  $127.16$  ( $2\text{CH}$ ),  $128.26$  ( $2\text{C}$ ),  $128.45$  ( $2\text{C}$ ),  $130.21$  ( $2\text{C}$ ),  $130.74$  ( $2\text{C}$ ),  $156.39$  ( $2\text{C}$ ),  $167.79$  ( $2\text{C}$ ).

**IR** (neat):  $\tilde{\nu}/\text{cm}^{-1} = 3386, 2923, 2875, 1692, 1628, 1556, 1516, 1487, 1368, 1281, 1187, 1086, 837, 751, 710, 562.$

**HR-ESI:**  $m/z = 771.3429$   $[\text{M}+\text{H}]^+$  (calculated for  $\text{C}_{50}\text{H}_{46}\text{N}_2\text{O}_6$   $m/z = 771.3429$ )

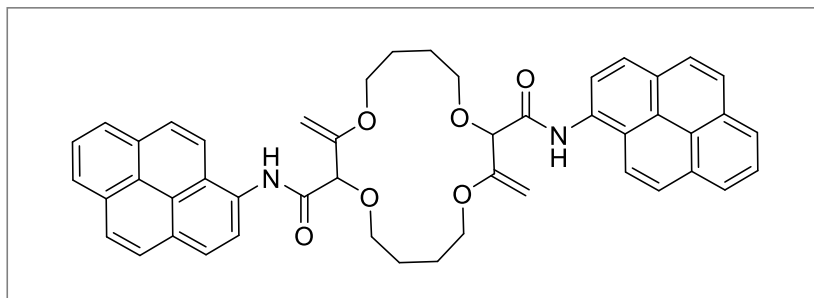

**Figure S14.** 16C4.

**Yield:** 80% of maroon solid (160 mg)

**M.p.** 238 °C - 240 °C (crystallized from CH<sub>2</sub>Cl<sub>2</sub> / Heptane)

**R<sub>f</sub>** : 0.47 (silica gel, mobile phase EtOAc)

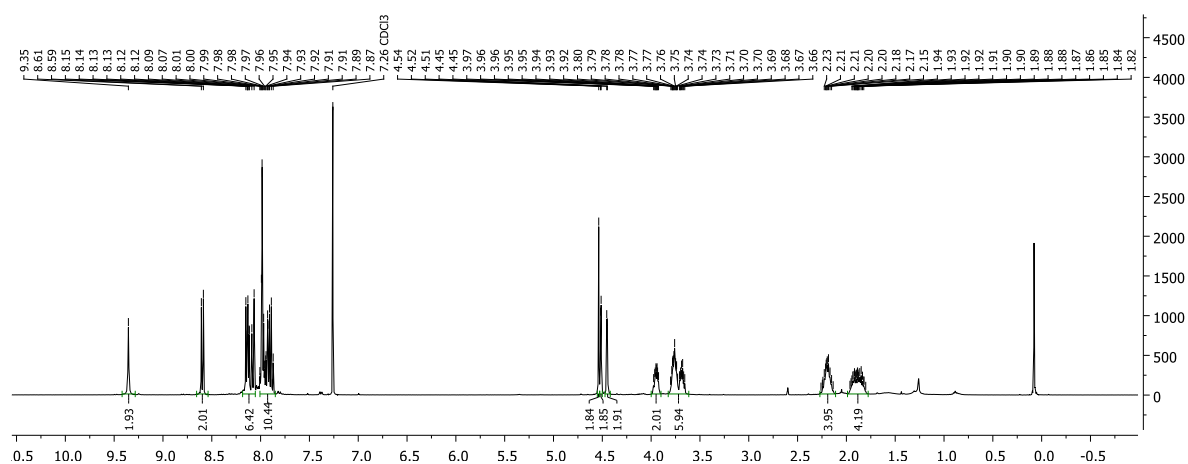

**Figure S15.** <sup>1</sup>H NMR (400 MHz, CDCl<sub>3</sub>): δ/ppm = 1.80 – 1.96 (m, 4H), 2.14 – 2.26 (m, 4H), 3.66 – 3.80 (m, 6H), 3.92 – 3.97 (m, 2H), 4.45 (d, *J* = 2.5 Hz, 2H), 4.52 (d, *J* = 2.4 Hz, 2H), 4.54 (s, 2H), 7.87 – 8.01 (m, 10H), 8.07 – 8.15 (m, 6H), 8.60 (d, *J* = 8.3 Hz, 2H), 9.35 (s, 2H).

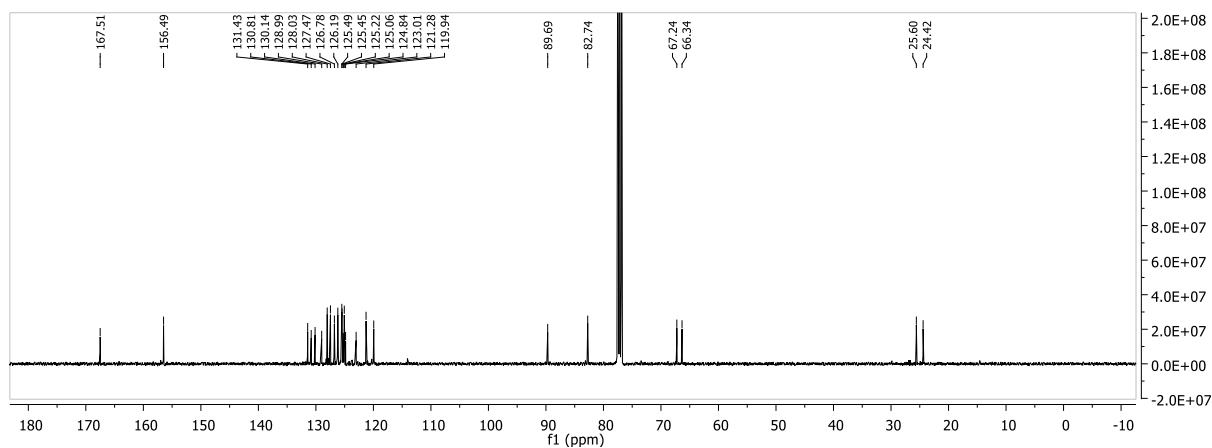

**Figure S16.**  $^{13}\text{C}$  NMR (101 MHz,  $\text{CDCl}_3$ ):  $\delta/\text{ppm} = 24.42$  ( $2\text{CH}_2$ ),  $25.60$  ( $2\text{CH}_2$ ),  $66.34$  ( $2\text{CH}_2$ ),  $67.24$  ( $2\text{CH}_2$ ),  $82.74$  ( $2\text{CH}$ ),  $89.69$  ( $2\text{CH}_2$ ),  $119.94$  ( $2\text{CH}$ ),  $121.28$  ( $2\text{CH}$ ),  $123.01$  ( $2\text{C}$ ),  $124.84$  ( $2\text{C}$ ),  $125.06$  ( $2\text{CH}$ ),  $125.22$  ( $2\text{C}$ ),  $125.45$  ( $2\text{CH}$ ),  $125.49$  ( $2\text{CH}$ ),  $126.19$  ( $2\text{CH}$ ),  $126.78$  ( $2\text{CH}$ ),  $127.47$  ( $2\text{CH}$ ),  $128.03$  ( $2\text{CH}$ ),  $128.99$  ( $2\text{C}$ ),  $130.14$  ( $2\text{C}$ ),  $130.81$  ( $2\text{C}$ ),  $131.43$  ( $2\text{C}$ ),  $156.49$  ( $2\text{C}$ ),  $167.51$  ( $2\text{C}$ ).

**IR** (neat):  $\tilde{\nu}/\text{cm}^{-1} = 3399, 2940, 2869, 1692, 1628, 1597, 1519, 1485, 1366, 1274, 1093, 1030, 955, 839, 819, 758, 711, 684, 588$ .

**HR-ESI:**  $m/z = 743.3128$   $[\text{M}+\text{H}]^+$  (calculated for  $\text{C}_{48}\text{H}_{42}\text{N}_2\text{O}_6$   $m/z = 743.3116$ )

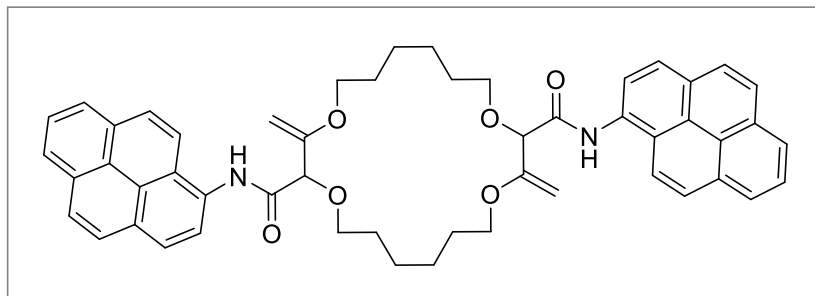

**Figure S17.** 20C4.

**Yield:** 35% of brown non crystalline solid (68 mg)

**R<sub>f</sub>** : 0.53 (silica gel, mobile phase EtOAc)

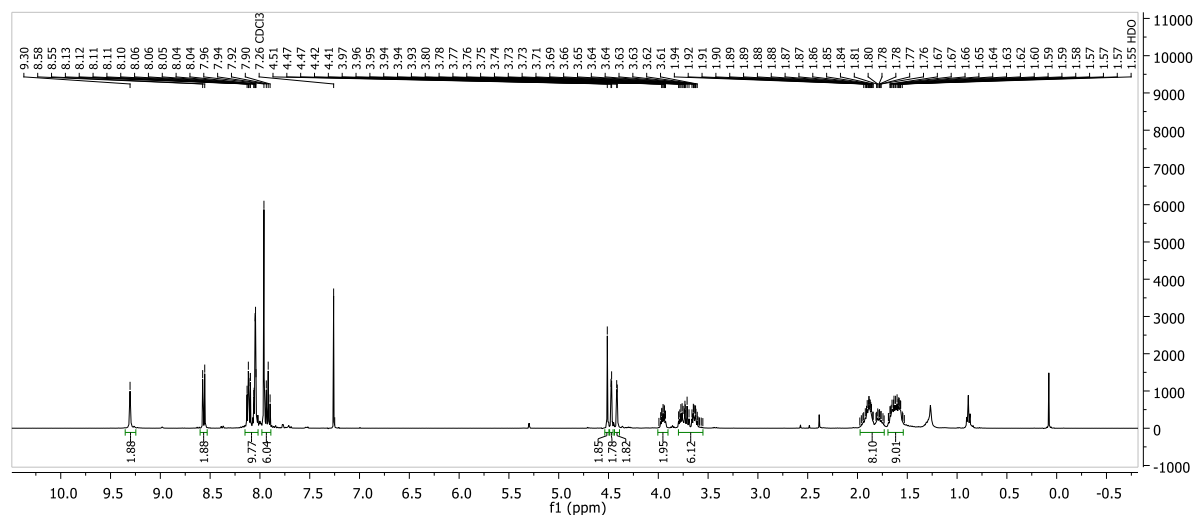

**Figure S18.** <sup>1</sup>H NMR (400 MHz, CDCl<sub>3</sub>): δ/ppm = 1.53 – 1.69 (m, 8H), 1.73 – 1.98 (m, 8H), 3.55 – 3.80 (m, 6H), 3.93 – 3.99 (m, 2H), 4.41 (d, *J* = 2.4 Hz, 2H), 4.47 (d, *J* = 2.4 Hz, 2H), 4.51 (s, 2H), 7.90 – 7.96 (m, 6H), 8.04 – 8.13 (m, 10H), 8.56 (d, *J* = 8.3 Hz, 2H) 9.30 (s, 2H).



**Figure S19.**  $^{13}\text{C}$  NMR (101 MHz,  $\text{CDCl}_3$ ):  $\delta/\text{ppm} = 25.16$  ( $2\text{CH}_2$ ),  $25.48$  ( $2\text{CH}_2$ ),  $28.66$  ( $2\text{CH}_2$ ),  $30.02$  ( $2\text{CH}_2$ ),  $67.09$  ( $2\text{CH}_2$ ),  $68.24$  ( $2\text{CH}_2$ ),  $82.81$  ( $2\text{CH}$ ),  $89.19$  ( $2\text{CH}_2$ ),  $119.92$  ( $2\text{CH}$ ),  $121.28$  ( $2\text{CH}$ ),  $122.95$  ( $2\text{C}$ ),  $124.77$  ( $2\text{C}$ ),  $125.04$  ( $2\text{CH}$ ),  $125.12$  ( $2\text{C}$ ),  $125.38$  ( $2\text{CH}$ ),  $125.44$  ( $2\text{CH}$ ),  $126.16$  ( $2\text{CH}$ ),  $126.69$  ( $2\text{CH}$ ),  $127.43$  ( $2\text{CH}$ ),  $127.90$  ( $2\text{CH}$ ),  $128.89$  ( $2\text{C}$ ),  $130.12$  ( $2\text{C}$ ),  $130.79$  ( $2\text{C}$ ),  $131.39$  ( $2\text{C}$ ),  $156.69$  ( $2\text{C}$ ),  $167.72$  ( $2\text{C}$ ).

**IR** (neat):  $\tilde{\nu}/\text{cm}^{-1} = 3383, 2928, 1686, 1600, 1557, 1517, 1486, 1261, 1186, 1082, 1015, 816, 758, 710$ .

**HR-ESI:**  $m/z = 799.3758$  [ $\text{M}+\text{H}$ ] $^+$  (calculated for  $\text{C}_{52}\text{H}_{50}\text{N}_2\text{O}_6$   $m/z = 799.3742$ )

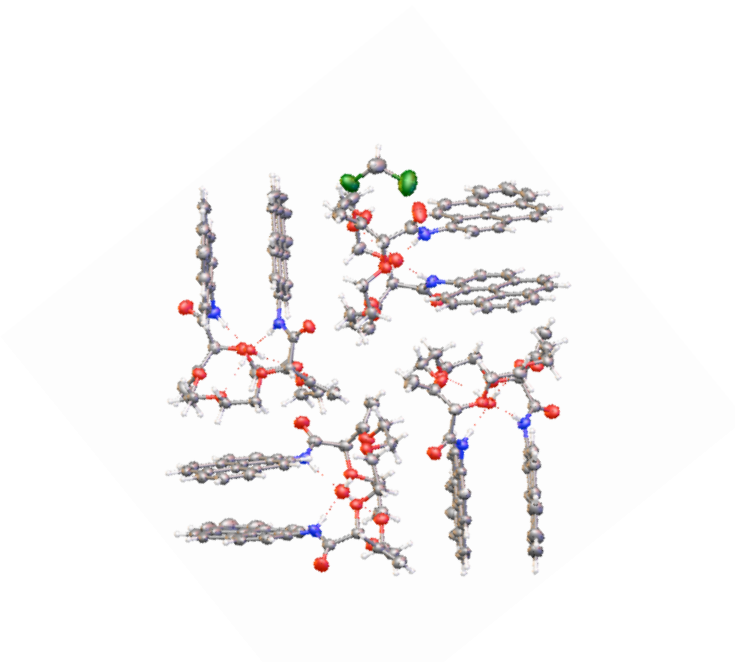

**Figure S20.** X – ray diffraction of 18C6. The highest positive residual density ( $2 \text{ e}\text{\AA}^{-3}$ ) is located near the chlorine atom of the solvent molecule, probably due to partial disorder. Hydrogen atoms of water molecules were found in the difference Fourier map and the water molecule was then refined as a rigid group.



**Table S1.** Detailed parameters of X – ray diffraction of 18C6.

|                                                |                                                                                  |
|------------------------------------------------|----------------------------------------------------------------------------------|
| <b>CCDC number</b>                             | <b>1045592</b>                                                                   |
| Formula                                        | C <sub>193</sub> H <sub>178</sub> Cl <sub>2</sub> N <sub>8</sub> O <sub>36</sub> |
| <i>D</i> <sub>calc.</sub> / g cm <sup>-3</sup> | 1.342                                                                            |
| $\mu$ /mm <sup>-1</sup>                        | 1.049                                                                            |
| Formula Weight                                 | 3256.33                                                                          |
| Colour                                         | colorless                                                                        |
| Shape                                          | plate                                                                            |
| Max Size/mm                                    | 0.23                                                                             |
| Mid Size/mm                                    | 0.14                                                                             |
| Min Size/mm                                    | 0.05                                                                             |
| <i>T</i> /K                                    | 180(2)                                                                           |
| Crystal System                                 | triclinic                                                                        |
| Space Group                                    | P-1                                                                              |
| <i>a</i> /Å                                    | 14.0049(2)                                                                       |
| <i>b</i> /Å                                    | 23.6564(3)                                                                       |
| <i>c</i> /Å                                    | 26.0431(4)                                                                       |
| $\alpha$ /°                                    | 71.0350(10)                                                                      |
| $\beta$ /°                                     | 82.9750(10)                                                                      |
| $\gamma$ /°                                    | 82.2710(10)                                                                      |
| <i>V</i> /Å <sup>3</sup>                       | 8057.2(2)                                                                        |
| <i>Z</i>                                       | 2                                                                                |
| <i>Z'</i>                                      | 1                                                                                |
| $\Theta$ <sub>min</sub> /°                     | 3.07                                                                             |
| $\Theta$ <sub>max</sub> /°                     | 73.39                                                                            |
| Measured Refl.                                 | 137062                                                                           |
| Independent Refl.                              | 31950                                                                            |
| Reflections Used                               | 25045                                                                            |
| <i>R</i> <sub>int</sub>                        | 0.0316                                                                           |
| Parameters                                     | 2164                                                                             |
| Restraints                                     | 0                                                                                |
| Largest Peak                                   | 2.102                                                                            |
| Deepest Hole                                   | -1.243                                                                           |
| GooF                                           | 0.996                                                                            |
| <i>wR</i> <sub>2</sub> (all data)              | 0.1677                                                                           |
| <i>wR</i> <sub>2</sub>                         | 0.1522                                                                           |
| <i>R</i> <sub>1</sub> (all data)               | 0.0691                                                                           |
| <i>R</i> <sub>1</sub>                          | 0.0533                                                                           |

**Table S2.** List of the membrane cocktail composition for the selectivity screening and the determination of the stability constant [mg].

|               | <b>M1</b> | <b>M2</b> | <b>M3</b> | <b>M4</b> | <b>M5</b> | <b>M6</b> | <b>M7</b> |
|---------------|-----------|-----------|-----------|-----------|-----------|-----------|-----------|
| <b>NaTFPB</b> | 0.44      | 0.44      | 0.44      | 0.44      | 0.44      | 0.44      | 0.89      |
| <b>15C4</b>   | 0.71      | -         | -         | -         | -         | -         | -         |
| <b>16C4</b>   | -         | 1.11      | -         | -         | -         | -         | -         |
| <b>18C4</b>   | -         | -         | 1.16      | -         | -         | -         | -         |
| <b>20C4</b>   | -         | -         | -         | 1.19      | -         | -         | -         |
| <b>18C6</b>   | -         | -         | -         | -         | 1.19      | -         | 2.38      |
| <b>PVC</b>    | -         | -         | -         | -         | -         | -         | 65.58     |
| <b>d-NPOE</b> | 98.89     | 98.85     | 98.40     | 98.85     | 98.79     | 98.79     | 131.16    |

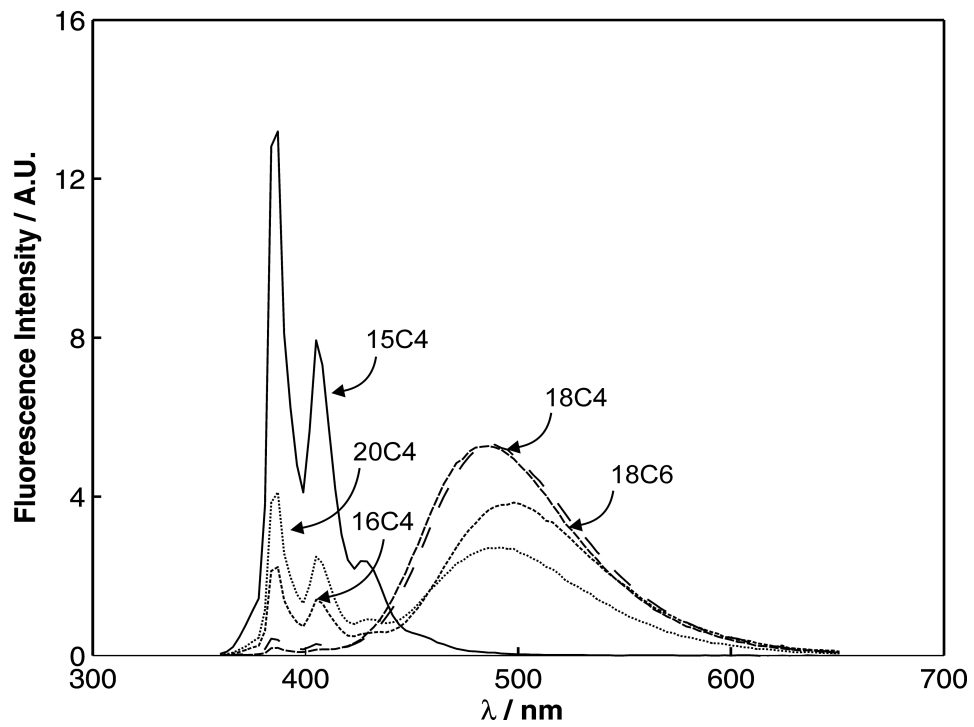

**Figure S21.** Emission spectra of synthesized compounds.

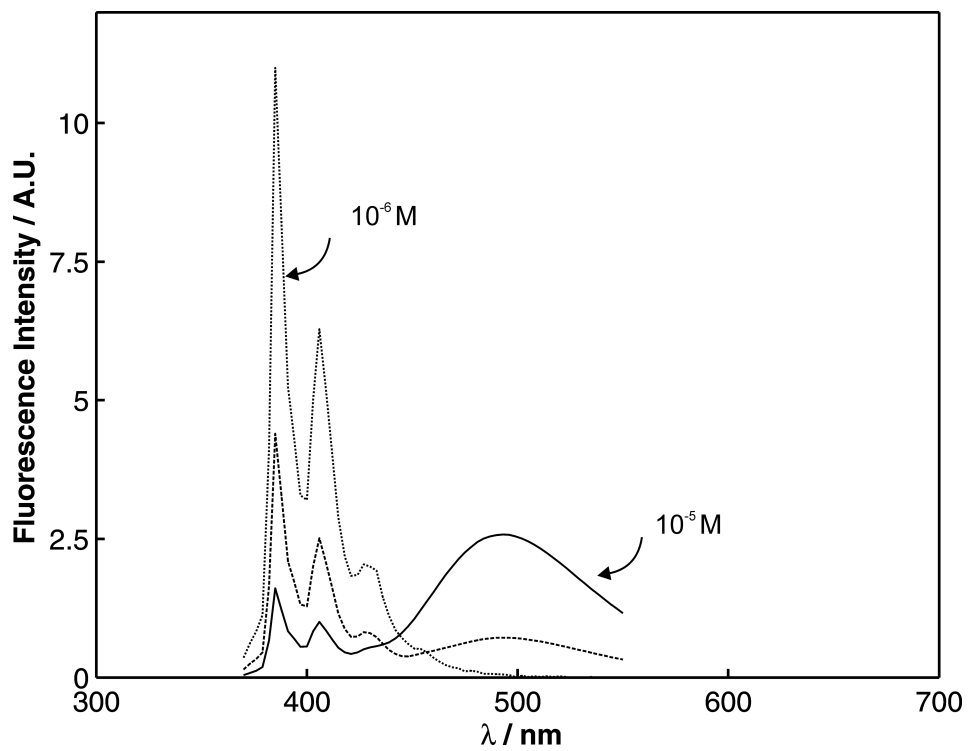

**Figure S22.** Normalized fluorescence intensities of emission of 15C4 and the excimer formation due to  $\pi$ - $\pi$  stacking interaction between two pyreneamide arms.

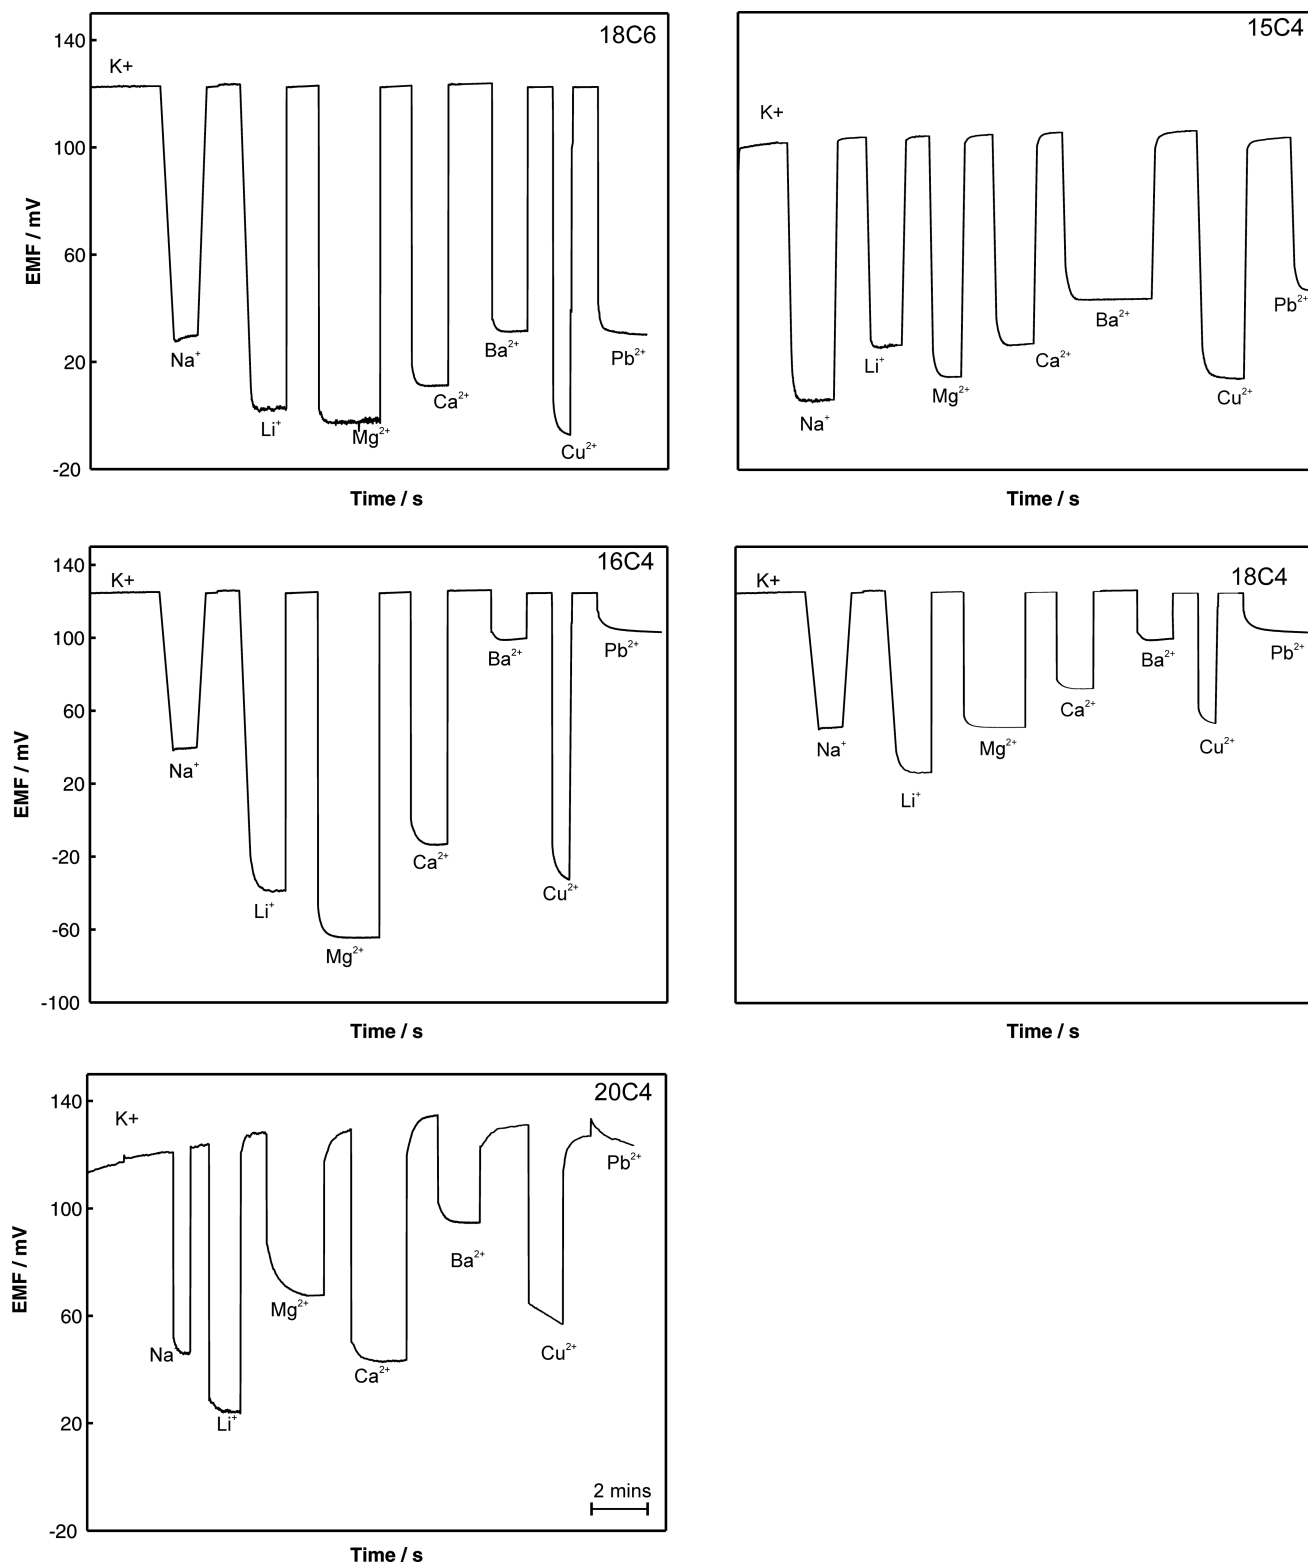

**Figure S23.** Selectivity screening of studied macrocyclic compounds.

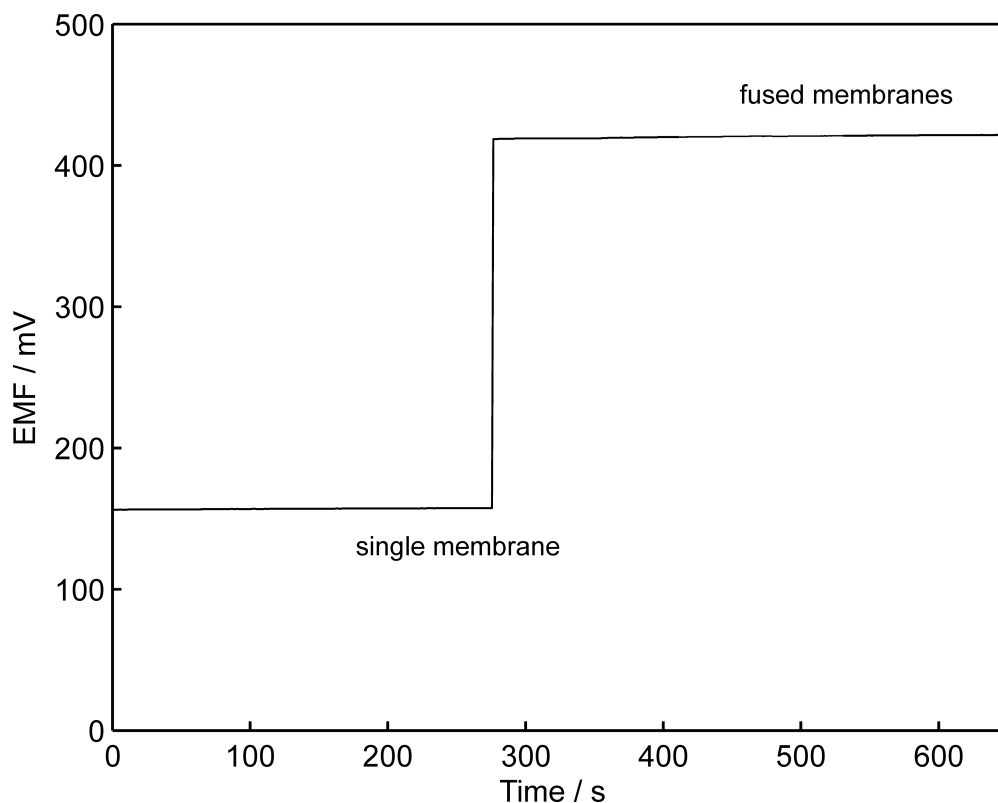

**Figure S24.** The observed potential changes of single membranes and fused membrane for determination of the complex formation constant using the segmented sandwich membrane method. This method is based on a direct measurement of potential arising from ligand-ion complexation. Two single membranes, one containing only the ion-exchanger salt and another one contains the same composition as the first with an additional ionophore, are well conditioned and examined under identical conditions in symmetrical setup (inner and outer filling solution are the same as one used for conditioning). Under symmetrical conditions (no concentration polarization on the phase boundaries) the membrane potential is zero and the observed potential of ISE corresponds to the sum of the constant potential contribution. The fusion of two single membranes results two different phase boundaries. On one side, the potential is dictated by ion-exchange process, while on the other side by ion-ionophore complexation and the potential difference is observed.

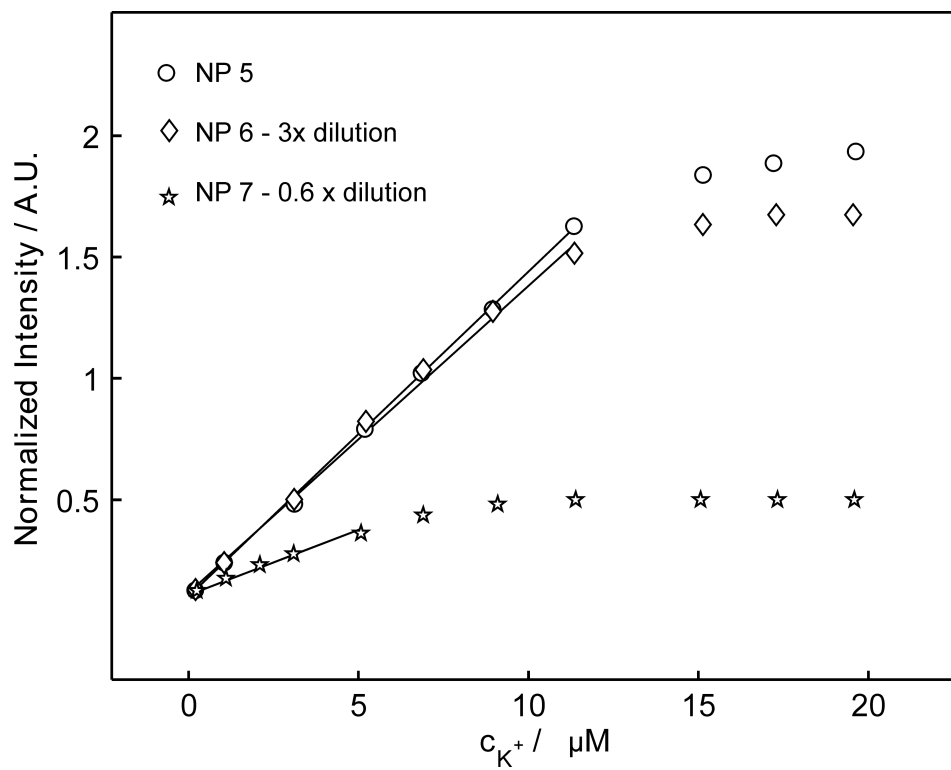

**Figure S25.** Optimization of the cocktail composition.
